# Supplementary material for: Quantification of effective thermal conductivity in the annealing process of Cu2ZnSn(S,Se)4 solar cells with 9.7% efficiency fabricated by magnetron sputtering
Source: Royal Society of Chemistry journal article supplement (doi:10.1039/c7se00617a), 2018-01-01
Supplement: c7se00617a1.pdf [file c7se00617a1.pdf]

Electronic Supplementary information for

**Quantification of effective thermal conductivity in the annealing  
process of  $\text{Cu}_2\text{ZnSn}(\text{S,Se})_4$  solar cells with 9.7% efficiency  
fabricated by magnetron sputtering**

Woo-Lim Jeong,<sup>‡a,b</sup> Jung-Hong Min,<sup>‡a,b</sup> Hae-Sun Kim,<sup>a,b</sup> Ji-Hun Kim,<sup>a</sup> Jin-Hyeok Kim<sup>c</sup> and  
Dong-Seon Lee<sup>a,b\*</sup>

---

<sup>a</sup> School of Electrical Engineering and Computer Science, Gwangju Institute of Science and Technology, Gwangju 61005, South Korea, E-mail: [dslee66@gist.ac.kr](mailto:dslee66@gist.ac.kr)

<sup>b</sup> Research Institute for Solar and Sustainable Energies, Gwangju 61005, South Korea

<sup>c</sup> Optoelectronics Convergence Research Center, Chonnam National University, 300 Youngbong-Dong, Puk-Gu, Gwangju 61186, South Korea

<sup>‡</sup> These authors contributed equally to this work.

**Table S1** Chemical composition and compositional ratio of the CZTSSe absorber films.

|                 | Elemental Component |             |             |             |            | Compositional Ratio |       |                    |      |
|-----------------|---------------------|-------------|-------------|-------------|------------|---------------------|-------|--------------------|------|
|                 | Cu<br>(at%)         | Zn<br>(at%) | Sn<br>(at%) | Se<br>(at%) | S<br>(at%) | Cu/<br>(Zn + Sn)    | Zn/Sn | (Se + S)/<br>Metal | Se/S |
| CZTSSe<br>HTC-1 | 22.66               | 13.18       | 12.35       | 38.91       | 12.9       | 0.89                | 1.07  | 1.08               | 3.02 |
| CZTSSe<br>HTC-2 | 22.74               | 14.82       | 12.17       | 36.04       | 14.24      | 0.84                | 1.22  | 1.01               | 2.53 |
| CZTSSe<br>HTC-3 | 21.7                | 15.45       | 12.07       | 36.44       | 14.34      | 0.79                | 1.28  | 1.03               | 2.54 |
| CZTSSe<br>LTC-1 | 23.84               | 12.63       | 12.01       | 34.11       | 17.4       | 0.97                | 1.05  | 1.06               | 1.96 |
| CZTSSe<br>LTC-2 | 22.42               | 15.23       | 11.98       | 32.42       | 17.95      | 0.82                | 1.27  | 1.01               | 1.81 |
| CZTSSe<br>LTC-3 | 22.18               | 16.22       | 11.05       | 32.75       | 17.8       | 0.81                | 1.47  | 1.02               | 1.84 |

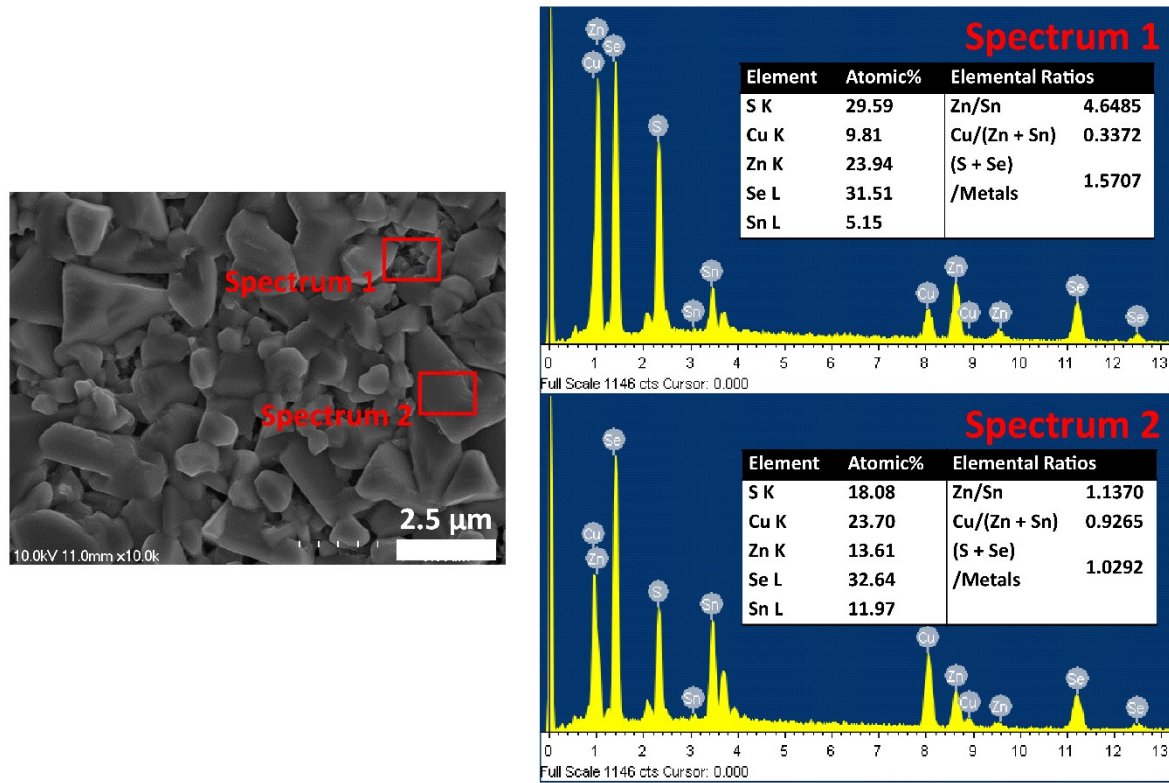

**Fig. S1** EDX spectra and atomic composition of CZTSSe LTC-2 absorber film. Spectrum 1 shows that small grains were mainly formed by Zn, S, and Se, and Spectrum 2 shows that the compositional ratio of the large grains were found to be Zn/Sn = 1.14, and Cu/(Zn + Sn) = 0.93 (Cu-poor and Zn-rich).

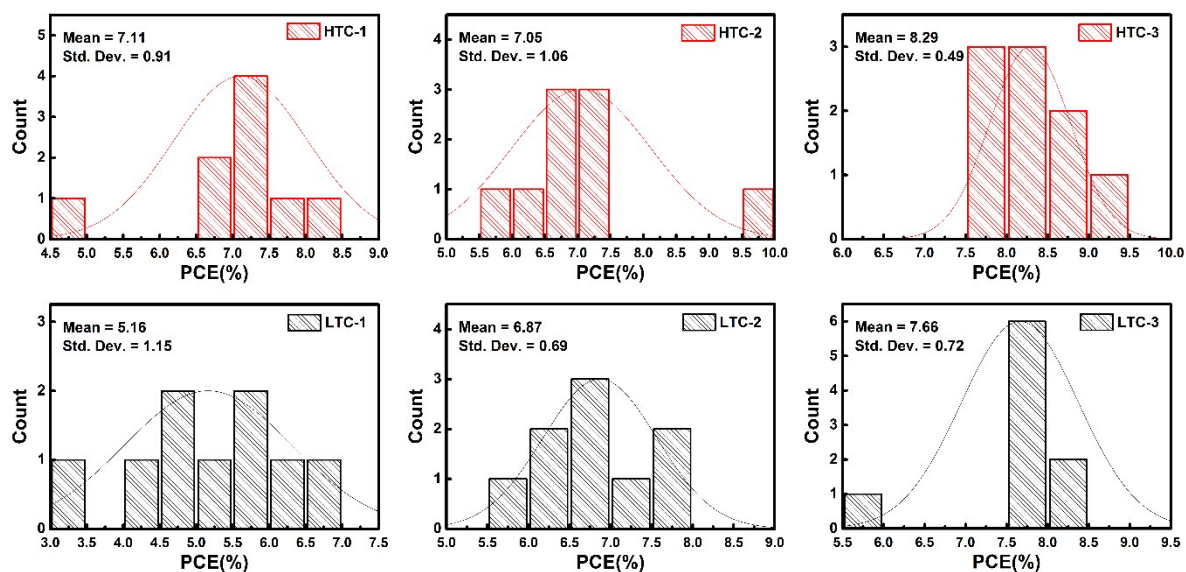

**Fig. S2** Histograms showing power conversion efficiency and the normal distribution curve of the six solar cells.

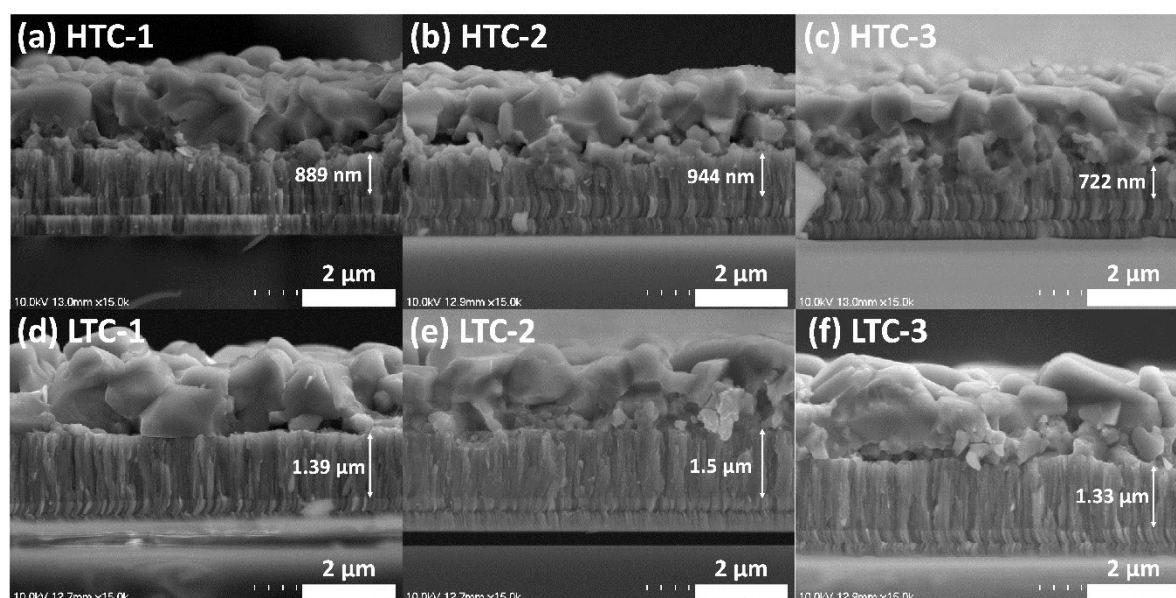

**Fig. S3** Cross-sectional SEM images of the CZTSSe absorber layers fabricated by sulfo-selenization with either an HTC (a– c) or an LTC (d– f) graphite box. The thickness of  $\text{Mo}(\text{S},\text{Se})_2$  is (a) 889 nm, (b) 944 nm, (c) 722 nm, (d) 1.39  $\mu\text{m}$ , (e) 1.5  $\mu\text{m}$ , and (f) 1.33  $\mu\text{m}$ .

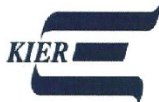

## Test Results

Report No. : KIER-17-0364

Page(3) / (3)Pages

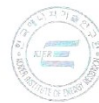

[Appendix 1]

### Chonnam National University CZTSSe solar cell

Device ID : CZTSSe #1  
Date of Test : April 25, 2017  
Simulator : WACOM, WXS-155S-L2 (Class-AAA)  
Reference solar cell : KIER-SS-UF #1  
Test condition : STC (AM1.5G, 100 mW/cm<sup>2</sup>, 25.0 ± 1.0 °C)  
Device Area : 0.190 16 cm<sup>2</sup> (active area)  
Sample Type : CZTSSe solar cell (glass substrate)

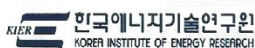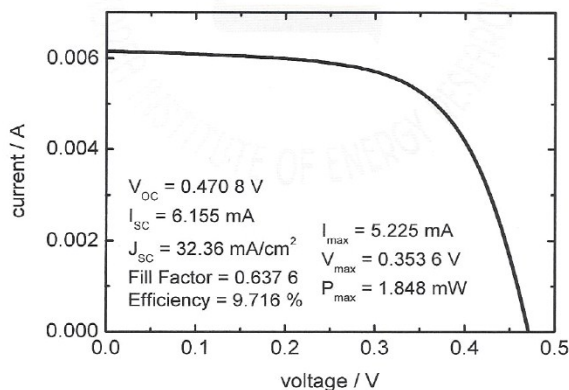

Operator: YoungJoo Eo

Photovoltaic Research Center, Korea Institute of Energy Research  
152, Gajeong-ro, Yuseong-gu, Daejeon, 34129, Korea  
Tel : +82-42-860-3182, e-mail : notask@kier.re.kr

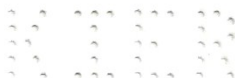

Fig. S4 Certificated power conversion efficiency of the best performing CZTSSe solar cell (CZTSSe HTC-2).
